# Supplementary material for: Heterostructure of vanadium pentoxide and mesoporous SBA-15 derived from natural halloysite for highly efficient photocatalytic oxidative desulphurisation
Source: Royal Society of Chemistry journal article supplement (doi:10.1039/d1ra06901b), 2021-01-01
Supplement: d1ra06901b1.pdf [file d1ra06901b1.pdf]

Supplementary

**Heterostructure of vanadium pentoxide and mesoporous SBA-15 derived from natural halloysite for highly efficient photocatalytic oxidative desulphurisation**

Manh B. Nguyen<sup>a,b</sup>, Xuan Nui Pham<sup>c\*</sup>, Huan V. Doan<sup>c,d,\*</sup>

<sup>a</sup>*Institute of Chemistry (IOC), Vietnam Academy of Science and Technology (VAST), 18 Hoang Quoc Viet, Cau Giay, Hanoi, Viet Nam*

<sup>b</sup>*Hanoi University of Science and Technology (HUST), 01 Dai Co Viet Road, Hanoi, Viet Nam*

<sup>c</sup>*Department of Chemical Engineering, Hanoi University of Mining and Geology, 18 Vien Street, Bac Tu Liem District, Hanoi, Viet Nam*

<sup>d</sup>*School of Chemistry, University of Bristol, Bristol BS8 1TS, UK*

*Corresponding authors' email addresses:*

[phamxuannui@gmail.com](mailto:phamxuannui@gmail.com) (XNP) and [huan.doan@bristol.ac.uk](mailto:huan.doan@bristol.ac.uk) (HVD)

**Contents**

|                                                                            |   |
|----------------------------------------------------------------------------|---|
| 1. Characterisation techniques .....                                       | 1 |
| 2. Additional information and results .....                                | 2 |
| 2.1. Unit cell parameters of $V_2O_5/Fe-Al-SBA-15$ samples .....           | 2 |
| 2.2. XPS result of 40% $V_2O_5/Fe-Al-SBA-15$ .....                         | 3 |
| 2.3. EDX spectra of 40% $V_2O_5/Fe-Al-SBA-15$ .....                        | 3 |
| 2.4. Gas sorption results of $V_2O_5/Fe-Al-SBA-15$ samples .....           | 4 |
| 2.5. Bandgap energy calculation .....                                      | 5 |
| 2.6. Photodegradation of DBT over 40% $V_2O_5/Fe-Al-SBA-15$ catalyst ..... | 6 |
| 2.7. Kinetics of photocatalytic degradation .....                          | 7 |

**1. Characterisation techniques**

The crystalline phase structure of the prepared materials was determined over the 2-theta range of 0.5–80 degrees (D8 ADVANCE, Bruker, Germany) using Cu  $K_\alpha$  radiation ( $\lambda = 0.154$  nm) as the X-ray source at a scan rate of  $2^\circ \text{ min}^{-1}$ . FT-IR spectra were recorded on a Bruker TENSOR37 instrument. SEM images were made on a JSM 740, operating at an accelerating voltage of 200 kV. Energy-dispersive X-ray spectroscopy analysis (EDS) was measured on a JED-2300 with gold coating. The Brunauer–Emmett–Teller (BET) surface areas of the samples were evaluated by the  $N_2$  adsorption isotherm at 77 K using a BET Sorptometer (Automated Sorptometer BET 201-A,

USA). The UV-Vis diffuse reflectance spectra (DRS) were measured with a Shimadzu UV2550 spectrophotometer. The PL spectra of the photocatalysts were detected using a spectrofluorometer Fluorolog FL3-22 JobinYvon-Spex, USA, using a 450W xenon lamp as an excitation source with an excitation wavelength of 400 nm. The surface electronic state was identified through X-ray photoelectron spectroscopy (XPS) performed on an AXISULTRA DLD Shimadzu Kratos spectrometer (Japan) using monochromatic Al  $K_{\alpha}$  radiation (1486.6 eV). The Mott-Schottky measurement in dark condition was performed in the potential range from  $-0.5$  to  $+3$  V (V vs. Ag/AgCl). The intensity of sunlight on the surface of the reaction was measured by instrument LX1330B.

## 2. Additional information and results

### 2.1. Unit cell parameters of $V_2O_5/Fe-Al-SBA-15$ samples

Table S1. Unit cell parameters of  $V_2O_5/Fe-Al-SBA-15$  samples

| Samples                   | $d_{100}$ ( $\text{\AA}^\circ$ ) | $a_o$ (nm) |
|---------------------------|----------------------------------|------------|
| Fe-Al-SBA-15              | 90.63                            | 10.46      |
| 10% $V_2O_5/Fe-Al-SBA-15$ | 93.64                            | 10.81      |
| 20% $V_2O_5/Fe-Al-SBA-15$ | 96.03                            | 11.09      |
| 30% $V_2O_5/Fe-Al-SBA-15$ | 101.28                           | 11.69      |
| 40% $V_2O_5/Fe-Al-SBA-15$ | 103.54                           | 11.96      |
| 50% $V_2O_5/Fe-Al-SBA-15$ | 101.15                           | 11.68      |

- $d_{100}$ , the space distance between (100) planes.
- $a_o$ , lattice cell parameter of the hexagonal structure.
- Unit cell parameter determined from the position of the (100) diffraction line as  $a_o = 2d_{100}/\sqrt{3}$

## 2.2. XPS result of 40%V<sub>2</sub>O<sub>5</sub>/Fe-Al-SBA-15

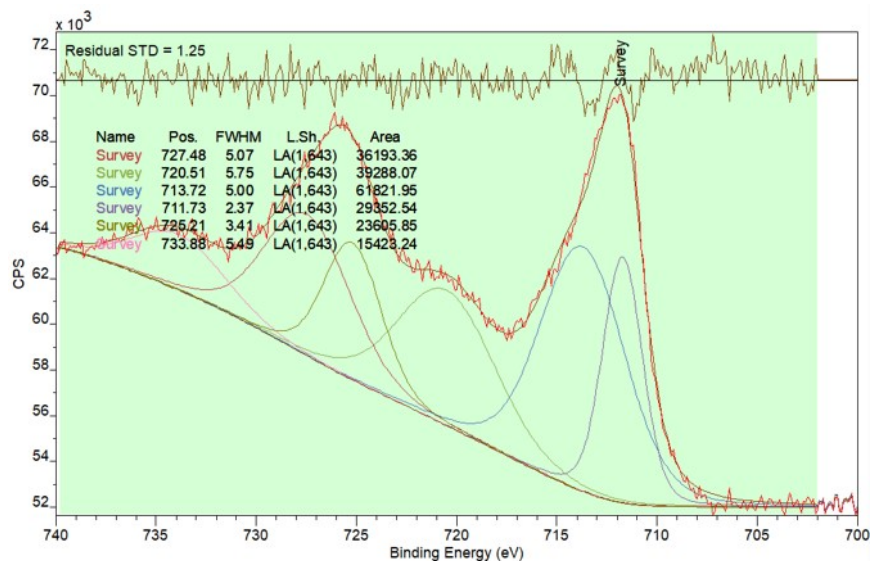

Fig. S1. The high-resolution XPS spectra of Fe 2p in 40%V<sub>2</sub>O<sub>5</sub>/Fe-Al-SBA-15

Table S2. Fe<sup>3+</sup>/Fe<sup>2+</sup> ratio in 40%V<sub>2</sub>O<sub>5</sub>/Fe-Al-SBA-15

|                  | Binding energy (eV) | Peak area | Total area | Fe <sup>3+</sup> /Fe <sup>2+</sup> |
|------------------|---------------------|-----------|------------|------------------------------------|
| Fe <sup>2+</sup> | 711.71              | 29352.54  | 52958.39   | 1.85                               |
|                  | 725.21              | 23605.85  |            |                                    |
| Fe <sup>3+</sup> | 713.72              | 61821.96  | 98015.32   |                                    |
|                  | 727.48              | 36193.36  |            |                                    |

## 2.3. EDX spectra of 40%V<sub>2</sub>O<sub>5</sub>/Fe-Al-SBA-15

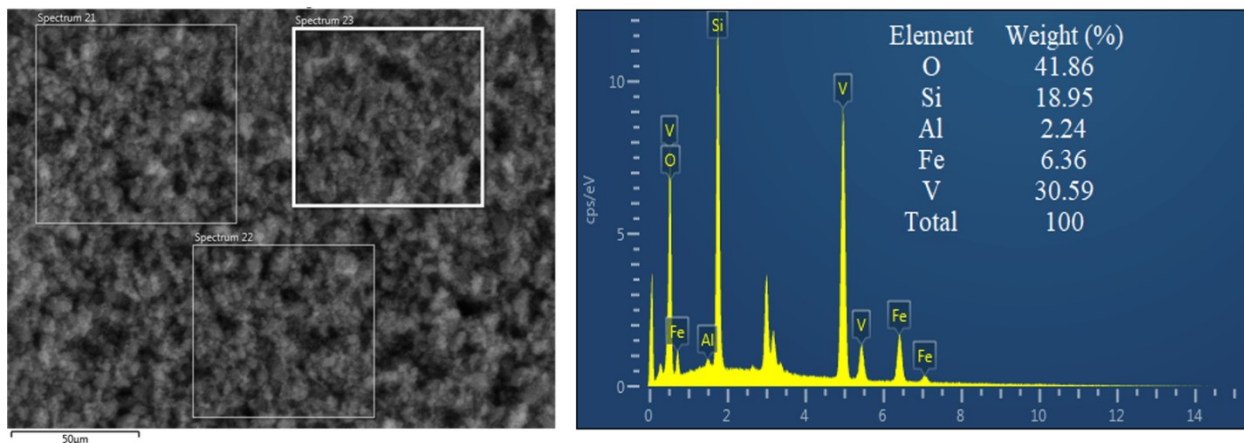

Fig. S2. EDX spectra of 40%V<sub>2</sub>O<sub>5</sub>/Fe-Al-SBA-15

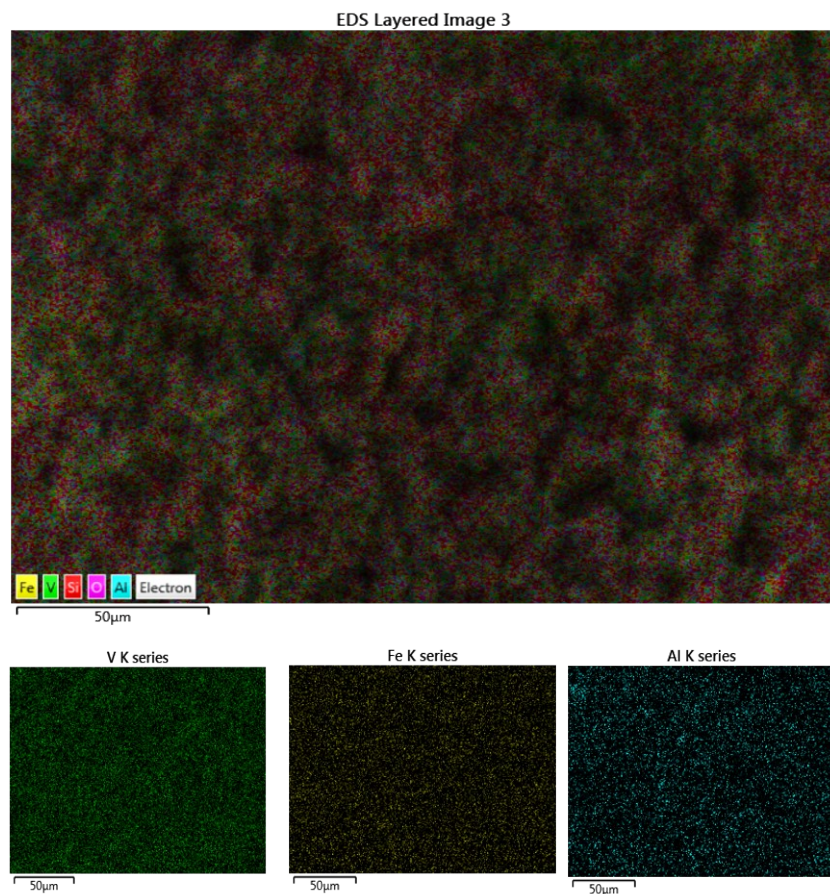

Fig. S3. EDX mapping images of 40%  $V_2O_5/Fe-Al-SBA-15$  sample

#### 2.4. Gas sorption results of $V_2O_5/Fe-Al-SBA-15$ samples

Table S3. Gas sorption results of  $Fe-Al-SBA-15$  and  $V_2O_5/Fe-Al-SBA-15$  samples

| Samples                   | $S_{BET}$ ( $m^2/g$ ) | $V_{pore}$ ( $cm^3/g$ ) | D (nm) |
|---------------------------|-----------------------|-------------------------|--------|
| Fe-Al-SBA-15              | 824                   | 1.46                    | 8.13   |
| 10% $V_2O_5/Fe-Al-SBA-15$ | 740                   | 1.34                    | 8.15   |
| 20% $V_2O_5/Fe-Al-SBA-15$ | 666                   | 1.18                    | 8.13   |
| 30% $V_2O_5/Fe-Al-SBA-15$ | 593                   | 1.09                    | 8.07   |
| 40% $V_2O_5/Fe-Al-SBA-15$ | 550                   | 0.86                    | 7.96   |
| 50% $V_2O_5/Fe-Al-SBA-15$ | 418                   | 0.59                    | 6.18   |

- $S_{BET}$ : Specific surface area calculated by the BET method.
- $D_p$ : Pore diameter and  $V_p$ : Pore volume calculated from the  $N_2$  desorption data based on the BJH method.

## 2.5. Bandgap energy calculation

The bandgap energy of the photocatalyst can be calculated using the following equation:

$$\alpha h\nu = A(h\nu - E_g)^{n/2} \quad (1)$$

where  $\alpha$  can be determined according to the Kubelka-Munk theory;  $h$  is the Planck constant;  $\nu$  is the frequency of light;  $A$  is absorption constant for direct transitions;  $E_g$  is the value of band gap energy;  $n$  depends on the characteristics of the transition in a semiconductor, for example,  $n = 1, 4$  for direct and indirect transitions, respectively [1]. The energy of the bandgap  $E_g$  can be estimated from the x-axis interference of the tangent line of the graph  $(\alpha h\nu)^2$  compared to the photon energy ( $h\nu$ ). The bandgap energy  $E_g$  calculated from Equation 1 of Fe-Al-SBA-15, 10%V<sub>2</sub>O<sub>5</sub>/Fe-Al-SBA-15, 20%V<sub>2</sub>O<sub>5</sub>/Fe-Al-SBA-15, 30%V<sub>2</sub>O<sub>5</sub>/Fe-Al-SBA-15, 40% V<sub>2</sub>O<sub>5</sub>/Fe-Al-SBA-15 and 50%V<sub>2</sub>O<sub>5</sub>/Fe-Al-SBA-15 samples is approximately 2.26, 2.16, 2.0, 1.92, 1.88 and 1.96 eV, respectively. Bandgap energies of V<sub>2</sub>O<sub>5</sub>/Fe-Al-SBA-15 samples were 1.88–2.26 eV, which was lower than that of nano TiO<sub>2</sub> (3.2 eV). These results accord with their capacities for light absorption.

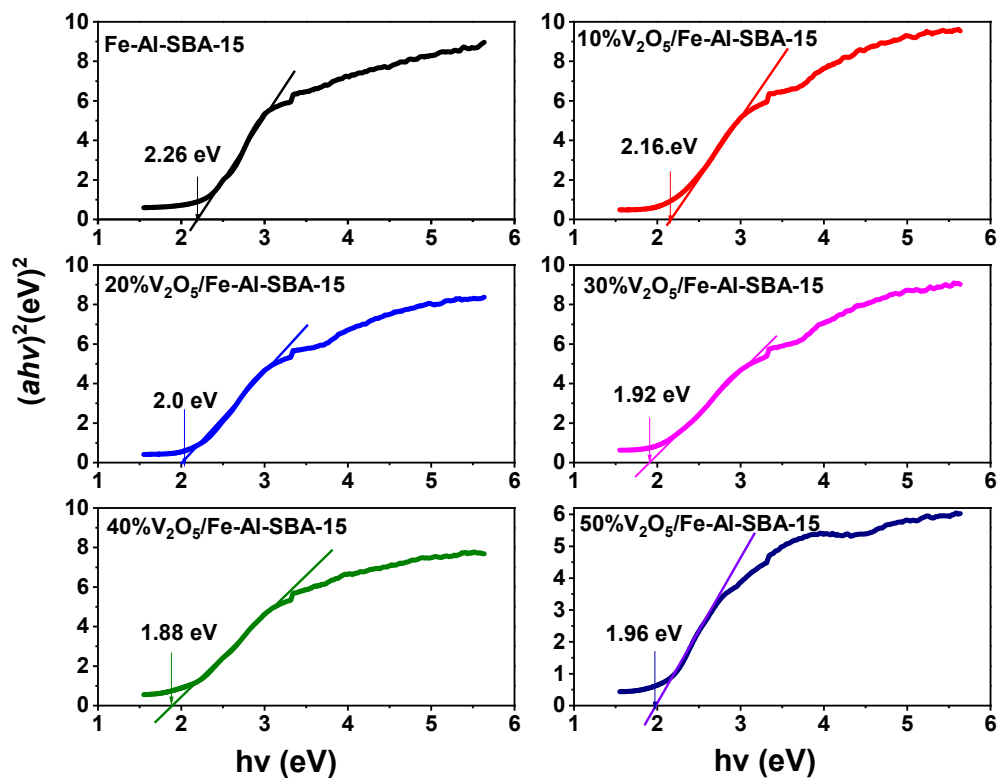

Fig. S4. Bandgap energies ( $E_g$ ) of V<sub>2</sub>O<sub>5</sub>/Fe-SBA-15 samples

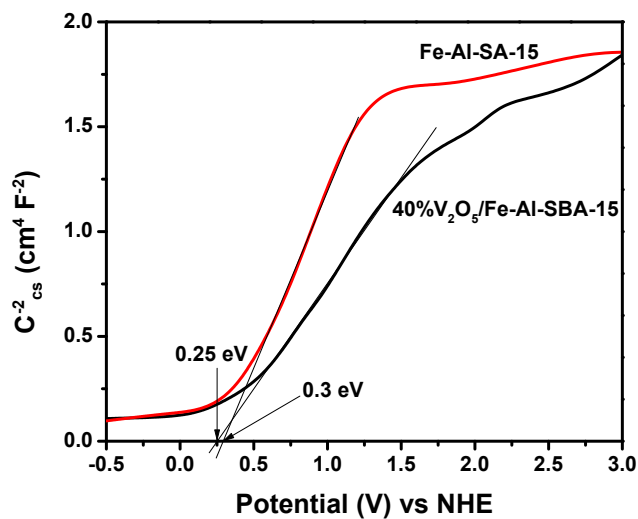

Fig. S5. Mott-Schottky plot for Fe-Al-SBA-15 and 40%V<sub>2</sub>O<sub>5</sub>/Fe-Al-SBA-15 samples. Mott-Schottky plots of Fe-Al-SBA-15 and 40%V<sub>2</sub>O<sub>5</sub>/Fe-Al-SBA-15 samples in 1M Na<sub>2</sub>SO<sub>4</sub> solution at a frequency of 1 kHz in dark condition as a function of applied potential (V vs Ag/AgCl).

## 2.6. Photodegradation of DBT over 40%V<sub>2</sub>O<sub>5</sub>/Fe-Al-SBA-15 catalyst

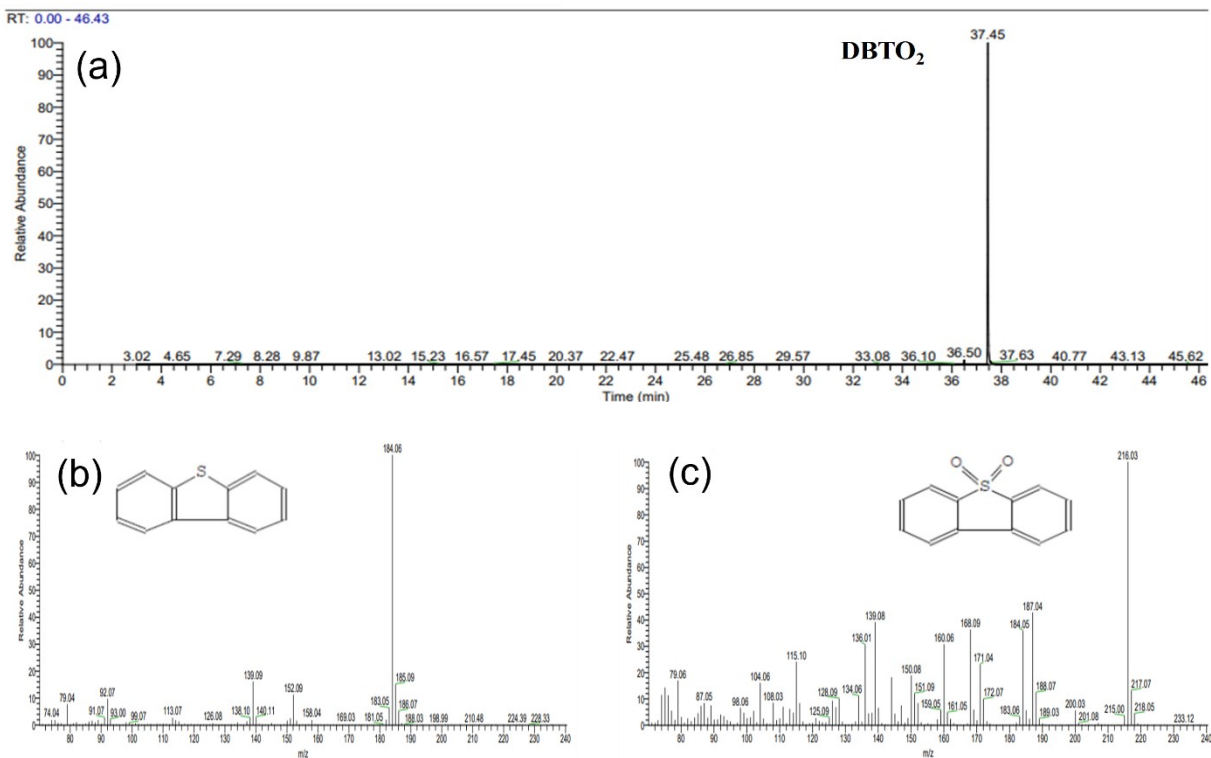

Fig. S6. (a) GC-MS spectra of the products in the photodegradation of DBT over 40%V<sub>2</sub>O<sub>5</sub>/Fe-Al-SBA-15 catalyst after 60 min (using 50 mg catalyst, 1 ml H<sub>2</sub>O<sub>2</sub>, 500 ppm DBT, at 70 °C). Further GC-MS analysis of the reaction product (b) compared to the initial reaction solution (c).

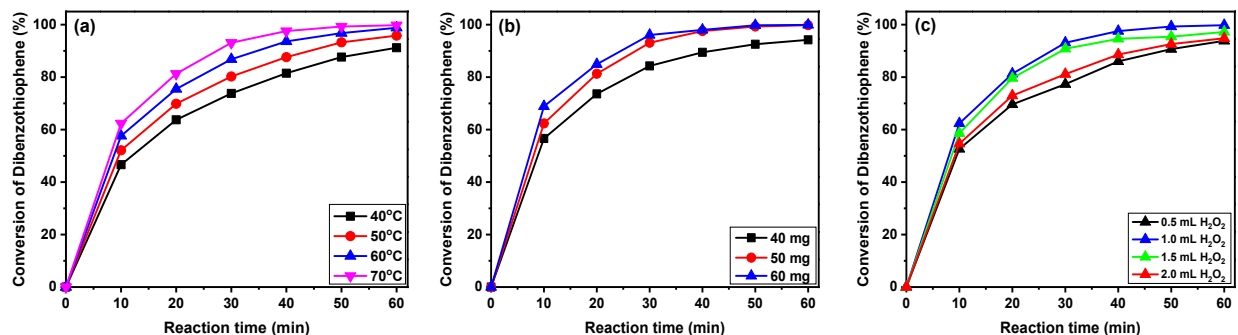

Fig. S7. Photodegradation of DBT over 40% $V_2O_5/Fe-Al-SBA-15$  catalyst at different conditions. (a) At temperatures ranging between 40 and 70 °C,  $m_{catalyst} = 50$  mg,  $V_{H_2O_2} = 1.0$  ml. (b) Using different amounts of catalyst (40 - 60 mg),  $V_{H_2O_2} = 1.0$  mL, reaction temperature at 70 °C. (c) Using different amounts of  $H_2O_2$  (0.5 - 2.0 ml),  $m_{catalyst} = 50$  mg, reaction temperature = 70 °C

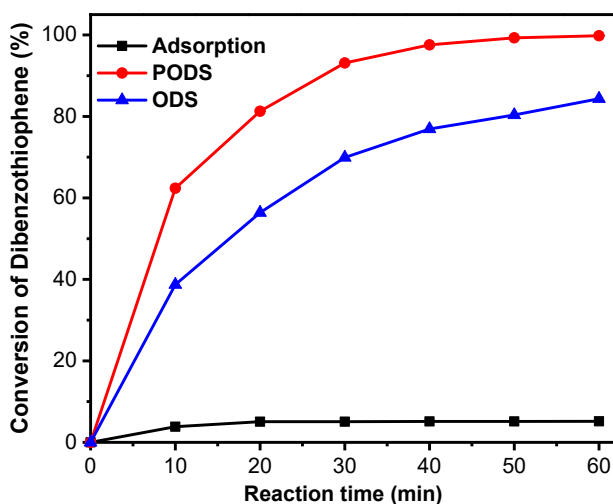

Fig. S8. The reaction of DBT (500 ppm) over 40% $V_2O_5/Fe-Al-SBA-15$  material (50 mg) at 70 °C under different conditions, i.e. adsorption without  $H_2O_2$  in the dark, oxidative desulphurisation (ODS) with 1 ml  $H_2O_2$  in the dark, and photocatalytic oxidative desulphurisation (PODS) with 1 ml  $H_2O_2$  under natural sunlight

## 2.7. Kinetics of photocatalytic degradation

From the abovementioned experiments, all the optimal reaction conditions were used in the system, i.e., 1.0 ml of  $H_2O_2$ , 50 ml of DBT (500 ppm DBT in *n*-octane), 50 mg of 40% $V_2O_5/Fe-Al-SBA-15$ , and operating temperatures of 40 °C, 50 °C, 60 °C, and 70 °C. The photocatalytic degradation of DBT as a function of irradiation time in the presence of 40% $V_2O_5/Fe-Al-SBA-15$  could be described by the pseudo-first-order reaction, as shown in Equation 2:

$$-\ln\left(\frac{C_t}{C_0}\right) = k_p t \quad (2)$$

where  $C_t$  and  $C_0$  are the concentrations at time  $t$  and time zero, respectively,  $k_p$  is the first-order reaction rate constant ( $\text{h}^{-1}$ ), and  $t$  is the irradiation time (h). The data shown in Fig. S9 could be satisfactorily analysed by the first-order kinetic Equation 2 to obtain the rate constant.

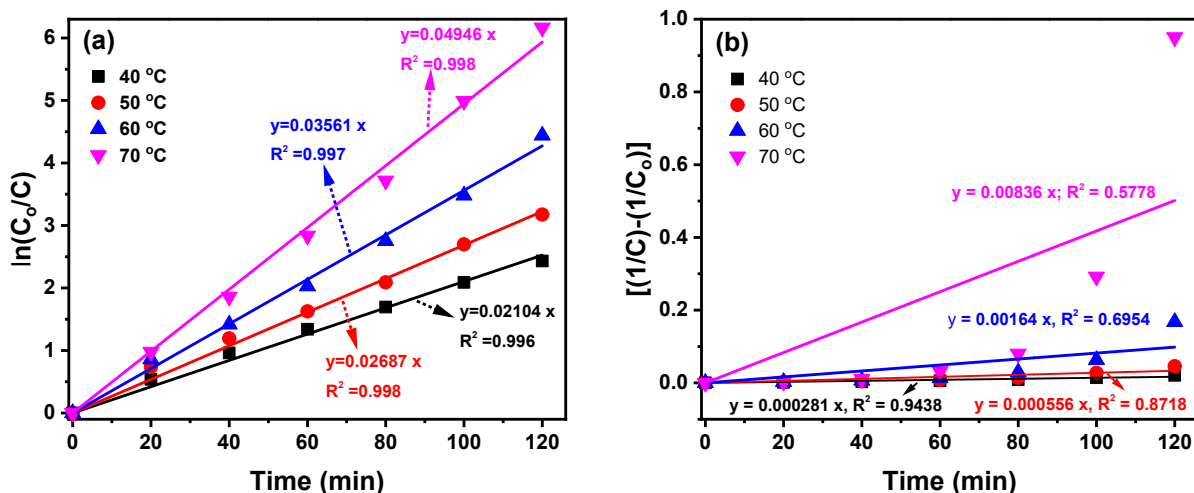

Fig. S9. Plots of (a) pseudo-first-order and (b) pseudo-second-order kinetic models for the degradation of DBT by photocatalytic oxidative desulphurisation at different temperatures

According to the plot shown in Fig. S9a, the first-order kinetic equation of the desulphurisation reaction of 40% $\text{V}_2\text{O}_5/\text{Fe-Al-SBA-15}$  was determined at different temperatures. That is,  $y = 0.04209x$  with the value of correlation coefficient  $R^2 = 0.996$ ,  $y = 0.05374x$  with the value of correlation coefficient  $R^2 = 0.998$ ,  $y = 0.07123x$  with the value of correlation coefficient  $R^2 = 0.997$ , and  $y = 0.09892x$  with the value of correlation coefficient  $R^2 = 0.998$  at temperatures of 40 °C, 50 °C, 60 °C, and 70 °C, respectively.

All the linear graphs agreed with the first-order reaction ( $R^2 > 0.99$ ). The kinetic rate constants ( $k_p$ ) of 40 °C, 50 °C, 60 °C, and 70 °C were measured at 2.5254, 3.2244, 4.2738 and 5.9352  $\text{h}^{-1}$ , respectively. The half-life of the experiment was calculated by substituting  $C_t$  with  $C_0/2$ . The results are shown in Equation 3:

$$t_{1/2} = \frac{0.693}{k_p} \quad (3)$$

where  $t_{1/2}$  is the half-life (h).

According to the kinetics study, the half-life ( $t_{1/2}$ ) of the DBT degradation reactions was determined to be 0.274, 0.215, 0.162, and 0.12 h at reaction temperatures of 40 °C, 50 °C, 60 °C, and 70 °C, respectively. These results indicate that as the relatively fast degradation rate of DBT



increased, the reaction temperature increased (70 °C), which was consistent with the increases in the reaction temperature and the reaction rate according to the Arrhenius Equation 5 [2] and resulted in a higher conversion of DBT.

Thus, the oxidative photocatalytic desulphurisation for DBT in the *n*-octane solvent using 40%V<sub>2</sub>O<sub>5</sub>/Fe-Al-SBA-15 was the pseudo-first-order reaction.

In contrast, if the reaction followed the second-order kinetics, the kinetic equation could be expressed as follows:

$$\frac{1}{[C]^{n-1}} = \frac{1}{[C_0]^{n-1}} + (n-1)kt \quad (4)$$

where  $C_t$  and  $C_0$  are the concentrations at time  $t$  and time zero, respectively,  $k$  is the second-order reaction rate constant,  $t$  is the irradiation time (h), and  $n$  is the reaction order ( $n = 2$  for the second-order equation). Plots were built to identify the relation between  $[(1/C) - (1/C_0)]$  versus the irradiation time at different temperatures, as shown in Fig. S9b.

As calculated, the second-order reaction did not seem to be suitable for the sulphur removal reaction. The kinetic data collected at 70 °C yielded a considerably low correlation coefficient with the value of  $R^2$  (0.57). In addition, the values obtained at 40 °C, 50 °C, and 60 °C did not converge, which showed an important fluctuation. These  $R^2$  values were considerably lower in the pseudo-second-order reaction than in the pseudo-first-order kinetic reaction model ( $R^2 > 0.99$ ), and the confidence value was insignificant for the former; hence, the pseudo-second-order reaction model was not considered for the photocatalytic degradation of DBT under sunlight irradiation.

The dependence of the rate constant  $k$  on the reaction temperature was expressed as an Arrhenius equation:

$$k = Ae^{-\frac{E_a}{RT}} \quad (5)$$

Accordingly,

$$\ln k = -\frac{E_a}{R} \left( \frac{1}{T} \right) + \ln A \quad (6)$$

where  $E_a$  is the apparent activation energy,  $A$  is the pre-exponential factor,  $R$  is the gas constant, and  $T$  is the reaction temperature (K). The Arrhenius plot considering the first-order reaction is shown in Fig. S9a. The apparent activation energy ( $E_a$ ) was calculated from the slope and the intercepts of the Arrhenius plot with a value of 30.52 kJ mol<sup>-1</sup>. This value was similar to the previously reported results; the activation energy was 32.5 kJ mol<sup>-1</sup> for DBT oxidation with C<sub>5</sub>H<sub>9</sub>NO.SnCl<sub>2</sub> coordinated ionic liquid [3]. Atsushi *et al.* reported that the  $E_a$  value for the oxidative desulphurisation of DBT was 32±2 kJ mol<sup>-1</sup> using MoO<sub>3</sub>/Al<sub>2</sub>O<sub>3</sub> catalyst [4]. Choi *et al.* reported that the  $E_a$  value for the oxidative desulphurisation of DBT was 29 kJ/mol using

polyoxometalate/H<sub>2</sub>O<sub>2</sub> catalyst [5]. Huang *et al.* reported that the  $E_a$  value for the oxidative desulphurisation of DBT was 28.7 kJ mol<sup>-1</sup> using a catalyst of quaternary ammonium bromide and phosphotungstic acid [6]. Alwan *et al.* reported that the  $E_a$  value for the oxidative desulphurisation of DBT was 36.26 kJ mol<sup>-1</sup> using Fe<sub>2</sub>O<sub>3</sub>/GO catalyst [7].

## References

- [1] M. Yang, W. Xu, J. Li, Z. Zhou, Y. Lu, *Optik (Stuttg)*. 193 (2019).
- [2] D. Xie, Q. He, Y. Su, T. Wang, R. Xu, B. Hu, *Cuihua Xuebao/Chinese J. Catal.* 36 (2015) 1205–1213.
- [3] F.T. Li, C.G. Kou, Z.M. Sun, Y.J. Hao, R.H. Liu, D.S. Zhao, *J. Hazard. Mater.* 205–206 (2012) 164–170.
- [4] A. Ishihara, D. Wang, F. Dumeignil, H. Amano, E.W. Qian, T. Kabe, *Appl. Catal. A Gen.* 279 (2005) 279–287.
- [5] A.E.S. Choi, S. Roces, N. Dugos, M.W. Wan, *Sustain. Environ. Res.* 26 (2016) 184–190.
- [6] G. Luo, Y. Lu, Y. Wang, D. Huang, 2007 AIChE Annu. Meet. (2007) 6221–6227.
- [7] H.H. Alwan, A.A. Ali, H.F. Makki, *Bull. Chem. React. Eng. Catal.* 15 (2020) 175–185.
